# Supplementary material for: Development of a career coaching model for medical students
Source: PubMed Central journal article supplement — Korean J Med Educ. 2016 Jan 27;28(1):127–36. doi: 10.3946/kjme.2016.19 (PMC4926935; doi:10.3946/kjme.2016.19), 2016-01-27
Supplement: kjme-28-1-127-app1.pdf [file kjme-28-1-127-app1.pdf]

Appendix 1. Evaluation Form of Experts

| Area          | Questions                                                                                                                                                                                                                                                                                                       | Response type        |
|---------------|-----------------------------------------------------------------------------------------------------------------------------------------------------------------------------------------------------------------------------------------------------------------------------------------------------------------|----------------------|
| Adequacy      | Does the model fit the purposes of the program?<br>Are the development tasks of each phase adequate for the medical students' career maturity level?<br>Are the goals, tasks, and competencies suggested in each phase appropriate?<br>Is the medical school curriculum related to career coaching appropriate? |                      |
| Linkage       | Are each of the phases connected and intensified?<br>Are the support systems connected and is the content appropriate?<br>Do connections or integration exist within the current curriculum and is the program content achievable?                                                                              | 5-Point Likert scale |
| Applicability | Is the model appropriate to the medical school system at a national level?<br>Are there expected positive outcomes when the model is applied to medical schools?                                                                                                                                                |                      |
| Other opinion |                                                                                                                                                                                                                                                                                                                 | Description          |
